# Supplementary material
Source: MDPI journal article supplement (https://www.mdpi.com/2673-6500/4/1/10)
Supplement: s1 [file s1]

## Supplementary Material

# Genomic Insights into the Taxonomy and Metabolism of the Cyanobacterium *Pannus brasiliensis* CCIBt3594

Mauricio Junior Machado <sup>1,†</sup>, Natalia Betancurt Botero <sup>2,†</sup>, Ana Paula Dini Andreote <sup>1</sup>, Anderson Miguel Teixeira Feitosa <sup>1</sup>, Rafael Vicentini Popin <sup>3</sup>, Kaarina Sivonen <sup>3</sup> and Marli F. Fiore <sup>1,\*</sup>

<sup>1</sup> Center for Nuclear Energy in Agriculture (CENA), University of São Paulo, Piracicaba 13416-000, SP, Brazil; mauriciomachado@usp.br (M.J.M.); apdini@gmail.com (A.P.D.A.); andersonfeitosa@usp.br (A.M.T.F.)

<sup>2</sup> School of Applied Sciences and Engineering, EAFIT University, Medellin 050022, Colombia; nbetancurtb@gmail.com

<sup>3</sup> Department of Microbiology, Faculty of Agriculture and Forestry, University of Helsinki, 00014 Helsinki, Finland; rvpopin@gmail.com (R.V.P.); kaarina.sivonen@helsinki.fi (K.S.)

\* Correspondence: fiore@cena.usp.br

† These authors contributed equally to this work.

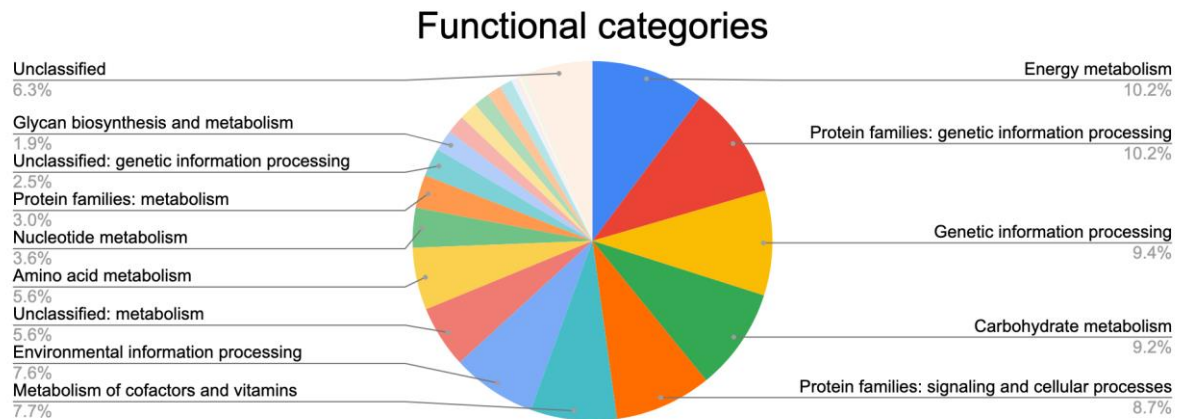

**Figure S1.** Functional classification of the genes annotated in the genome of *Pannus brasiliensis* CCIBt3594.

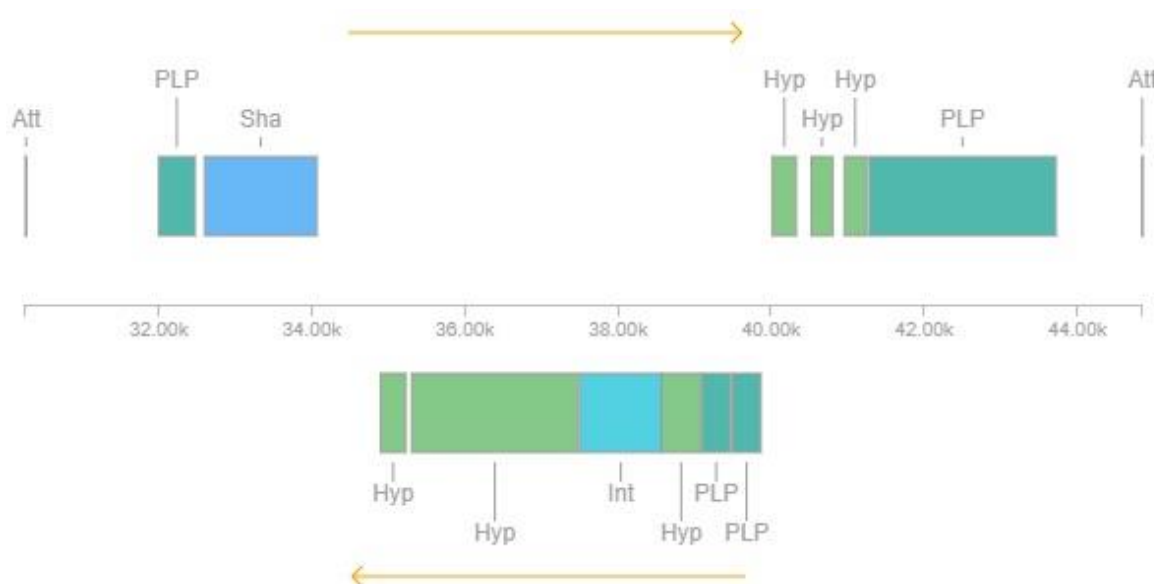

**Figure S2.** Prophage region identified in the contig number 17 in the genome of *Pannus brasiliensis* CCIBt3594. PLP: Phage-like Protein; Sha: Tail Shaft; Hyp: Hypothetical Protein; Int: Integrase.

**Table S1.** Identity of the amino acid sequences of the of *nif*, *isc*, *fdx* and *hsc* genes in *Pannus brasiliensis* CCIBt3594 genome.

| Gene        | Protein                                          | % Identity | Specie                               | NCBI Accession |
|-------------|--------------------------------------------------|------------|--------------------------------------|----------------|
| <i>nifK</i> | nitrogenase molybdenum-iron protein subunit beta | 85.55      | <i>Hydrococcus</i> sp. C42_A2020_068 | MBF2018560.1   |
|             |                                                  | 86.12      | <i>Hydrococcus rivularis</i>         | WP_073598932.1 |
| <i>nifD</i> | nitrogenase molybdenum-iron protein alpha chain  | 91.84      | <i>Pleurocapsa</i> sp. PCC 7327      | WP_015145032.1 |
|             |                                                  | 90.38      | <i>Hydrococcus rivularis</i>         | WP_073599038.1 |
| <i>nifH</i> | nitrogenase iron protein                         | 90         | <i>Cyanothece</i> sp. BG0011         | WP_198648223.1 |
|             |                                                  | 89.66      | <i>Crocospaera subtropica</i>        | WP_009546639.1 |
| <i>iscU</i> | Fe-S cluster assembly protein NifU               | 78.41      | <i>Crocospaera</i> sp.               | MDJ0658368.1   |
|             |                                                  | 77.7       | <i>Rippkaea orientalis</i>           | WP_012595103.1 |
| <i>nifS</i> | cysteine desulfurase NifS                        | 85.5       | <i>Gloeocapsa</i> sp. DLM2.Bin57     | TVQ43199.1     |
|             |                                                  | 82.75      | <i>Oscillatoria salina</i>           | WP_224411706.1 |
| <i>fdx</i>  | 4Fe-4S binding protein                           | 57.27      | <i>Gloeocapsa</i> sp. DLM2.Bin57     | TVQ43198.1     |
|             |                                                  | 54.27      | <i>Cyanobacterium</i> sp. uoEpiScrs1 | WP_267383980.1 |

|             |                                                            |       |                                          |                    |
|-------------|------------------------------------------------------------|-------|------------------------------------------|--------------------|
| <i>nifB</i> | nitrogenase<br>cofactor<br>biosynthesis<br>protein NifB    | 78.05 | <i>Pleurocapsa</i> sp. PCC 7327          | WP_015145027.<br>1 |
|             |                                                            | 77.85 | <i>Hydrococcus rivularis</i>             | WP_073598927.<br>1 |
| <i>nifJ</i> | pyruvate:<br>ferredoxin<br>(flavodoxin)<br>oxidoreductase  | 86.42 | <i>Microcystis aeruginosa</i><br>W13-16  | NCQ69820.1         |
|             |                                                            | 86.33 | <i>Microcystis aeruginosa</i><br>L111-01 | NCR22450.1         |
| <i>nifW</i> | nitrogenase-<br>stabilizing/prote<br>ctive protein<br>NifW | 69.16 | <i>Eubalotheca natronophila</i>          | WP_146294458.<br>1 |
|             |                                                            | 69.72 | <i>Crocospaera</i> sp.                   | WP_007305809.<br>1 |
| <i>hesA</i> | HesA/MoeB/Thi<br>F family protein                          | 81.96 | <i>Hydrococcus rivularis</i>             | WP_073598939.<br>1 |
|             |                                                            | 81.57 | <i>Pleurocapsa</i> sp. PCC 7327          | WP_015145041.<br>1 |
| <i>hesB</i> | iron-sulfur<br>cluster assembly<br>accessory<br>protein    | 77.69 | <i>Hydrococcus rivularis</i>             | WP_073598940.<br>1 |
|             |                                                            | 76.03 | <i>Pleurocapsa</i> sp. PCC 7327          | WP_015145042.<br>1 |
| <i>iscS</i> | cysteine<br>desulfurase                                    | 74.87 | <i>Microcystis aeruginosa</i><br>TA09    | REJ46172.1         |
|             |                                                            | 74.62 | <i>Microcystis</i> sp. M04BS1            | MCA2552547.1       |

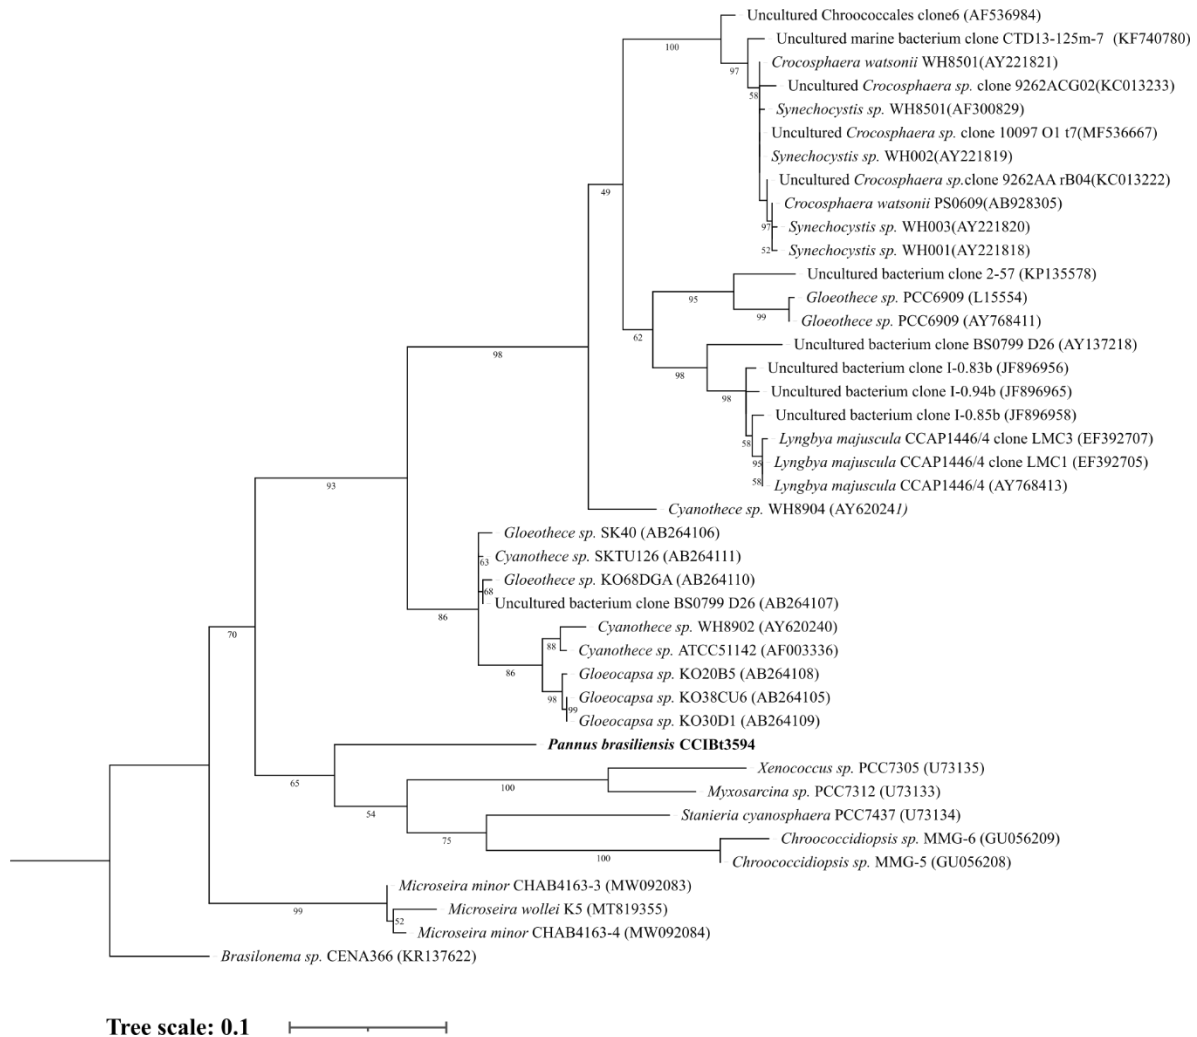

**Figure S3.** Maximum-likelihood Phylogenetic tree using *nifH* gene displaying the relationship of *Pannus brasiliensis* CCIBt3594 (in bold). 1000 resampling bootstrap test was performed. Bootstrap values 50% are displayed at nodes.

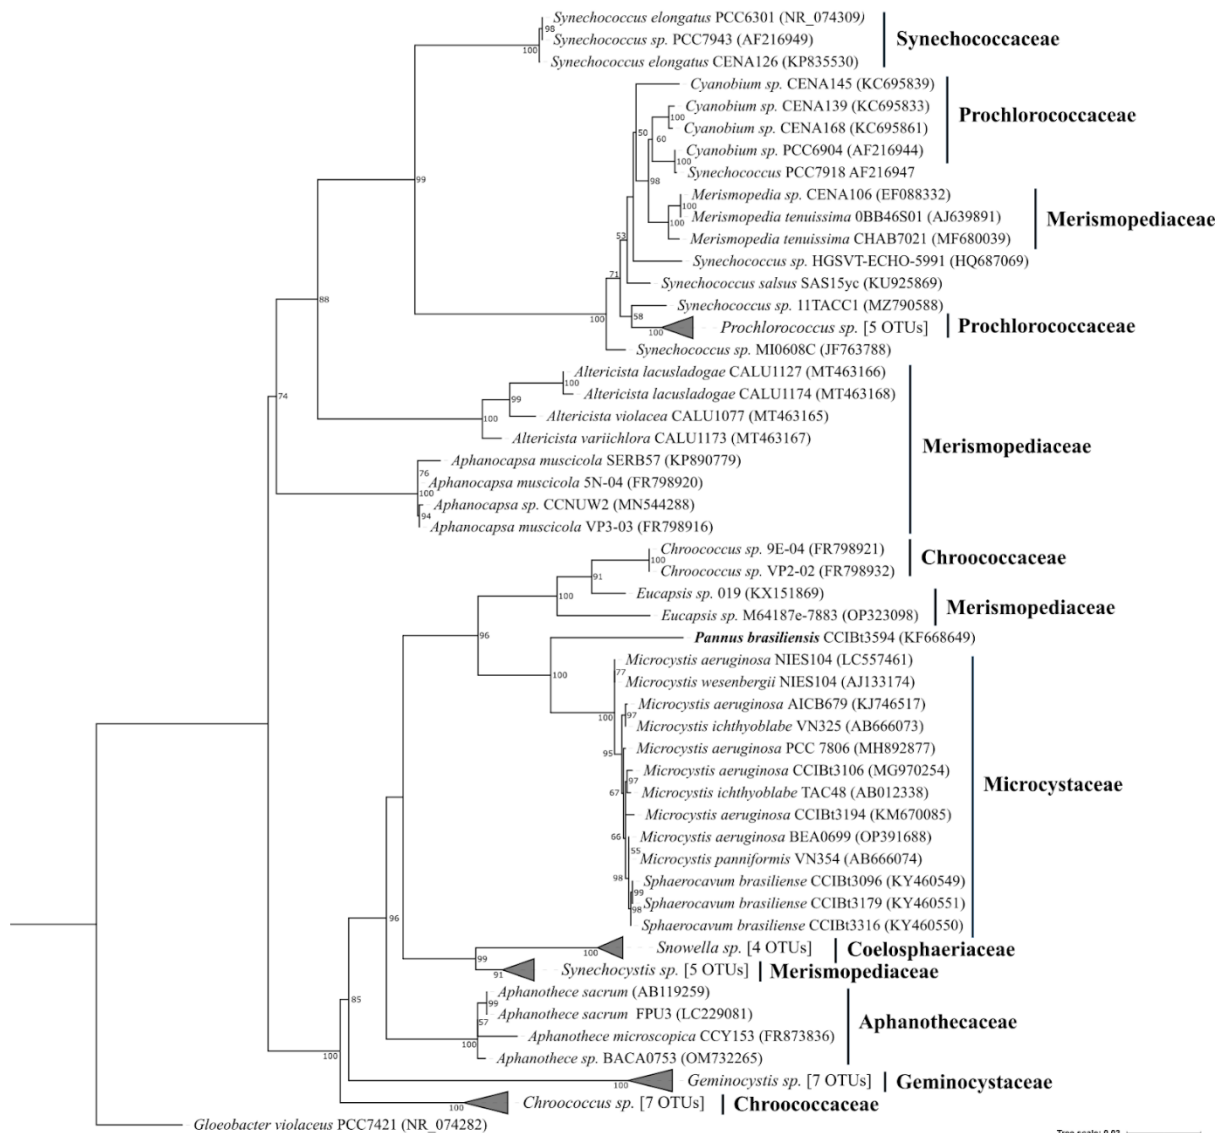

**Figure S4.** Phylogenetic tree using 16S rDNA gene displaying the relationship of *Pannus brasiliensis* CCIBt3594 (in bold) with other species of order Synechococcales and Chroococcales available in NCBI. Maximum-likelihood and 1000 resampling bootstrap test was performed. Bootstrap values 50% are displayed at nodes.

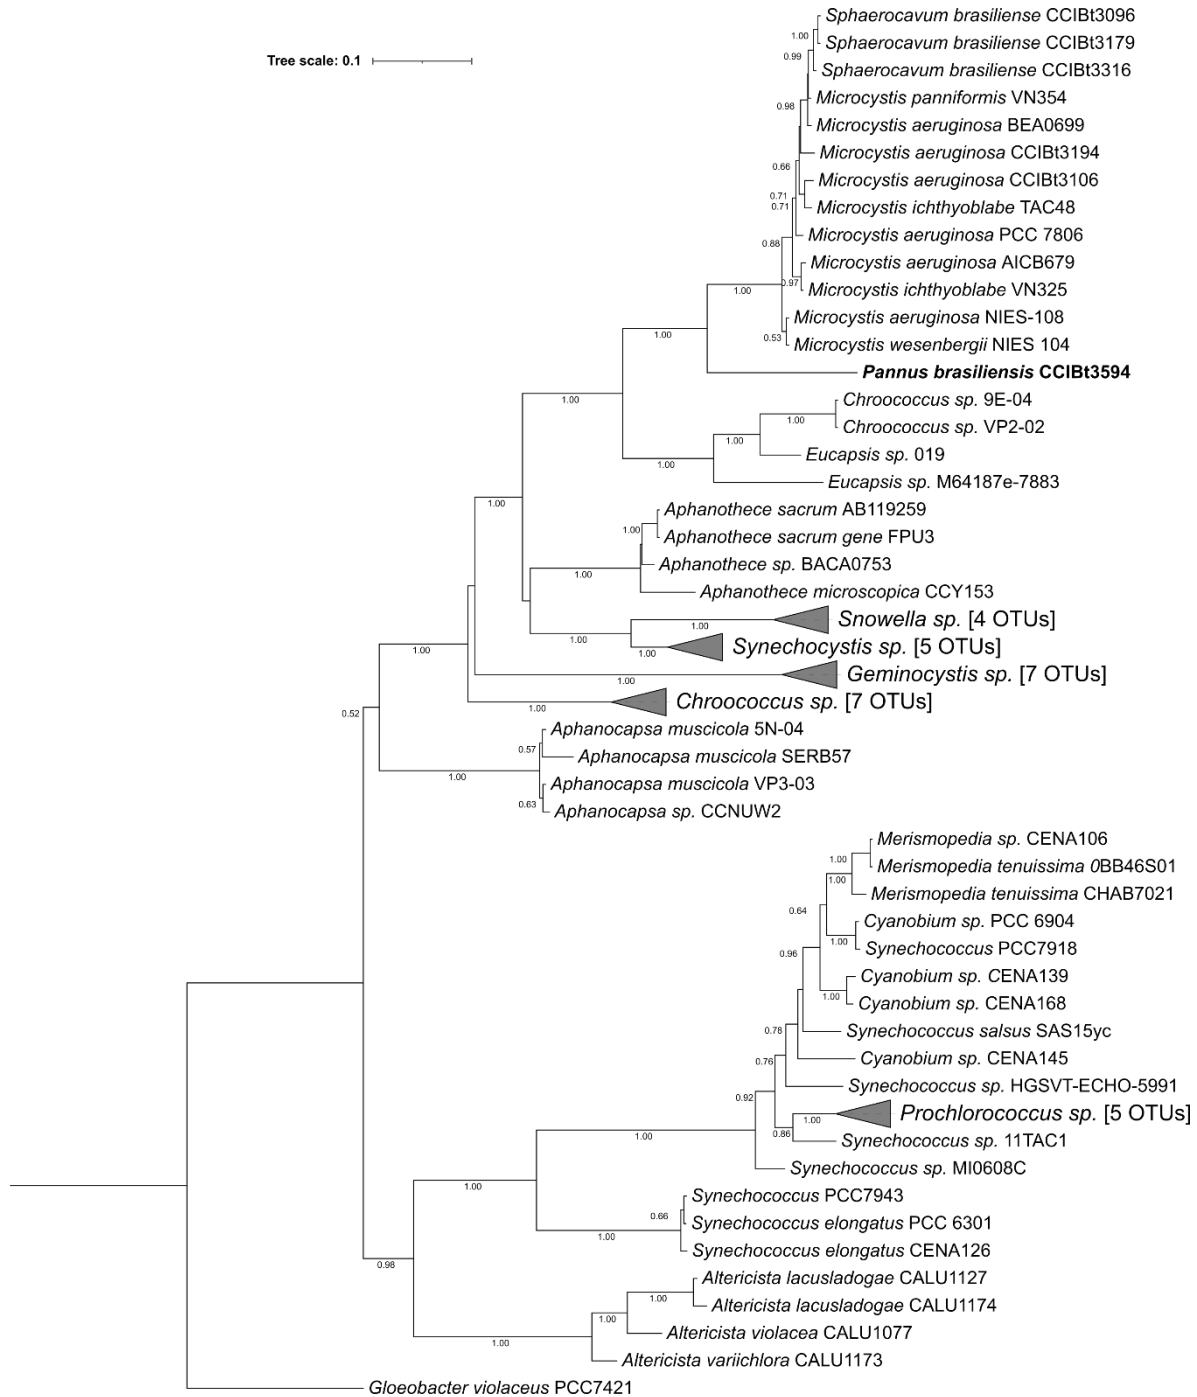

**Figure S5** Phylogenetic tree reconstructed by the Bayesian Inference method displaying the relationship of *Pannus brasiliensis* CCIBt3594 (in bold) with other species of order Synechococcales and Chroococcales available in NCBI. Bayesian posterior probabilities are represented on each node.

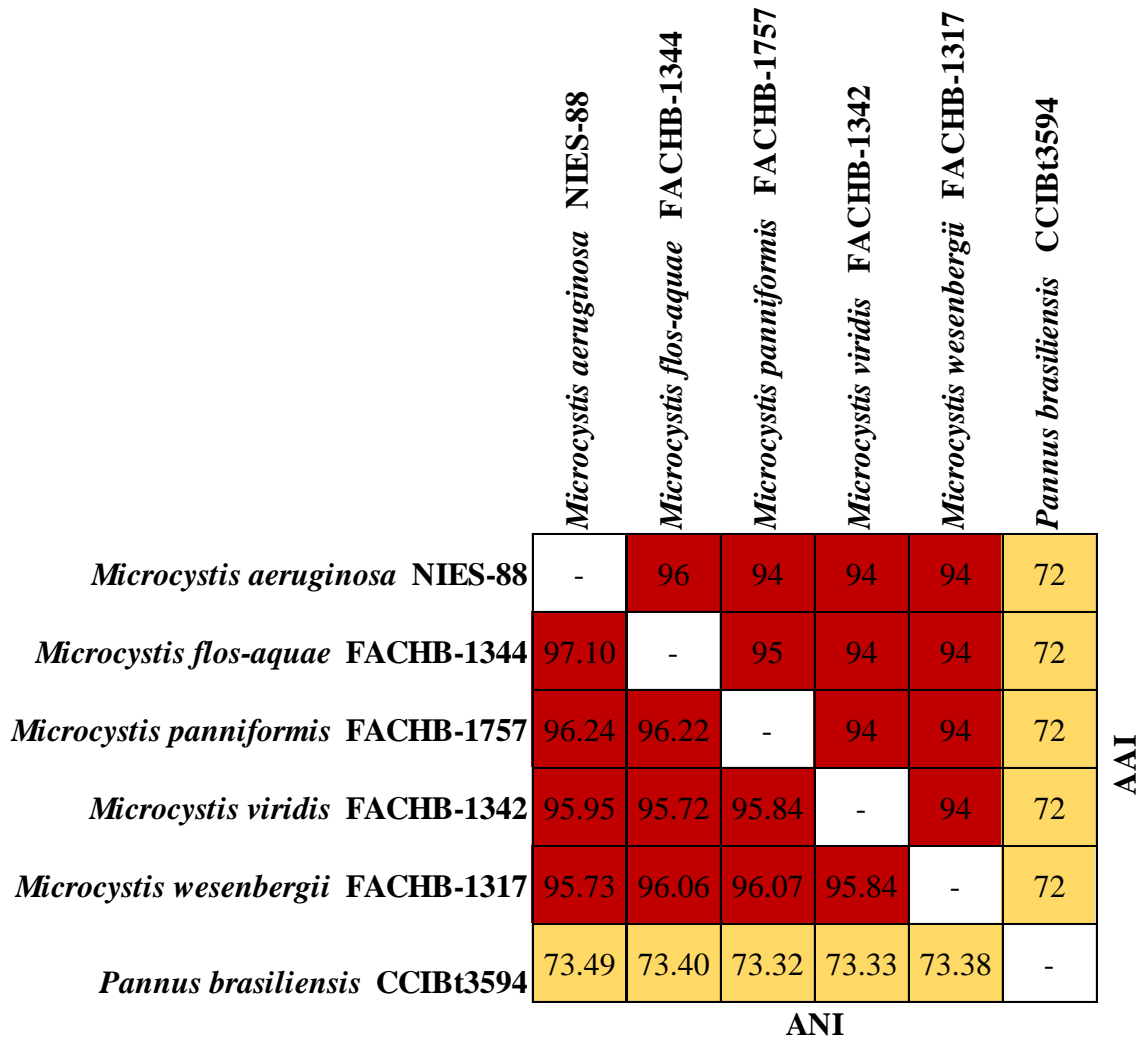

**Figure S6.** Heatmap showing the Average Nucleotide Identity (ANI) and the Average Amino acids Identity (AAI) among the genomes of *Pannus brasiliensis* CCIBT3594 and related species of the genus *Microcystis* spp.

**Table S2.** The *in silico* DDH values for *Pannus brasiliensis* CCIBt3594 and selected reference genomes of *Microcystis* genera.

| Reference genome                          | DDH   | Distance | Prob.<br>DDH >= 70% | G+C<br>difference |
|-------------------------------------------|-------|----------|---------------------|-------------------|
| <i>Microcystis aeruginosa</i> NIES-88     | 21.20 | 0.2068   | 0                   | 9.31              |
| <i>Microcystis flos-aquae</i> FACHB-1344  | 20.80 | 0.2110   | 0                   | 9.41              |
| <i>Microcystis panniformis</i> FACHB-1757 | 20.80 | 0.2108   | 0                   | 9.69              |
| <i>Microcystis viridis</i> FACHB-1342     | 20.90 | 0.2098   | 0                   | 9.46              |
| <i>Microcystis wesenbergii</i> FACHB-1317 | 21.10 | 0.2085   | 0                   | 9.53              |
